# Supplementary material
Source: Springer Nature journal article supplement (https://www.springermedizin.de/resource/supplementary/12879_2013_4163_MOESM1_ESM.pdf/9445954)
Supplement: MOESM1 [file 9445954]

Nasal swab

Isolated DNA

### Characterization + Genotyping

- |                                         |                 |               |
|-----------------------------------------|-----------------|---------------|
| Methicillin resistance                  | <i>mecA</i>     | + <i>pta</i>  |
| <i>Staphylococcus</i> speciation        | <i>tufB</i>     | + <i>yqi</i>  |
| Mupirocin resistance plasmid            | <i>mupA</i>     | + <i>tpi</i>  |
| Toxic shock gene                        | <i>TSST1</i>    | + <i>arcC</i> |
| PVL and $\alpha$ -hemolysin genes       | <i>PVL/hukD</i> | + <i>aroE</i> |
| <i>S. aureus</i> specific nuclease gene | <i>nuc</i>      | + <i>yqi</i>  |
| PVL SNP for R or H type                 | <i>PVL/hukD</i> | + <i>gmk</i>  |
| Mupirocin resistance                    | <i>mec5</i>     | + <i>aroE</i> |

PCR  
Desalting

Mass Spectrometer

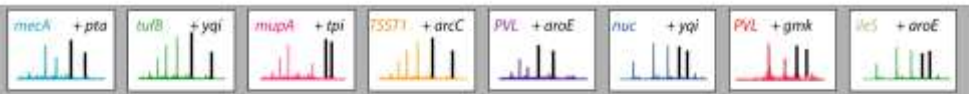

|                 |                 |                 |                 |                 |                 |                 |                 |
|-----------------|-----------------|-----------------|-----------------|-----------------|-----------------|-----------------|-----------------|
| A22 Q11 C21 T21 | A43 Q28 C19 T35 | A35 Q27 C17 T25 | A39 Q20 C17 T25 | A46 Q19 C17 T35 | A42 Q20 C19 T25 | A46 Q21 C17 T31 | A33 Q07 C15 T23 |
| A31 Q28 C22 T28 | A41 Q37 C22 T41 | A32 Q25 C22 T25 | A49 Q26 C20 T33 | A39 Q24 C18 T21 | A37 Q30 C18 T37 | A50 Q30 C20 T32 | A40 Q38 C13 T43 |

MRSA PVL+  
*mupA*+ TSST+  
CC 8 / USA300

Base composition signature  
comparison to known USA genotypes  
and characterization genes

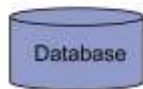

Strain types identified
